# Supplementary material for: Reconstruction of droughts in India using multiple land-surface models (1951–2015)
Source: Copernicus journal article supplement (doi:10.5194/hess-22-2269-2018), 2018-04-16
Supplement: Supplementary file 1 [file hess-22-2269-2018-supplement.zip]

Archive with 2 entries (2 files):
- hess-22-2269-2018-supplement-title-page.pdf
- suppliment_material_R2.docx
