# Supplementary material for: Reconstruction of droughts in India using multiple land-surface models (1951–2015)
Source: Copernicus journal article supplement (doi:10.5194/hess-22-2269-2018), 2018-04-16
Supplement: Supplementary file 1 [file hess-22-2269-2018-supplement.zip › hess-22-2269-2018-supplement-title-page.pdf]

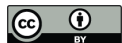

*Supplement of*

**Relative performance of empirical and physical models  
in assessing the seasonal and annual glacier surface  
mass balance of Saint-Sorlin Glacier (French Alps)**

**Marion Réveillet et al.**

*Correspondence to:* Marion Réveillet ([marion.reveillet@cea-az.fr](mailto:marion.reveillet@cea-az.fr))

The copyright of individual parts of the supplement might differ from the CC BY 4.0 License.
